# Supplementary material for: Thromboembolic, cardiovascular and overall mortality risks of aromatase inhibitors, compared with tamoxifen treatment: an outpatient-register-based retrospective cohort study
Source: PubMed Central journal article supplement — Ther Adv Med Oncol. 2020 Mar 25;12:1758835920909660. doi: 10.1177/1758835920909660 (PMC7097872; doi:10.1177/1758835920909660), 2020-03-25
Supplement: 21-11-2019_Supplementary_data.pdf [file 21-11-2019_Supplementary_data.pdf]

## Supplemental material

Supplementary table 1. ICD-10 codes used to identify the outcomes of the study

| Main outcome                | Secondary outcome              | ICD-10 code                                                                                                                                                                                                                                                                              |
|-----------------------------|--------------------------------|------------------------------------------------------------------------------------------------------------------------------------------------------------------------------------------------------------------------------------------------------------------------------------------|
| Thromboembolic events (TEE) | Pulmonary embolism (PE)        | I26, I26.0, I26.9                                                                                                                                                                                                                                                                        |
|                             | Deep vein thrombosis (DVT)     | G08, I67.6, I80, I80.0, I80.1, I80.2, I80.3, I80.8, I80.9, I81, I82, I82.0, I82.1, I82.2, I82.3, I82.8, I82.9, O22.2, O22.3, O22.5, O87.0, O87.1, O87.3                                                                                                                                  |
| Cardiovascular events (CVE) | Coronary artery disease (CAD)  | I20, I20.0, I20.1, I20.8, I20.9, I21, I21.0, I21.1, I21.2, I21.3, I21.4, I21.9, I22, I22.0, I22.1, I22.8, I22.9, I23, I23.0, I23.1, I23.2, I23.3, I23.4, I23.5, I23.6, I23.8, I24, I24.0, I24.1, I24.8, I24.9, I25, I25.0, I25.1, I25.2, I25.3, I25.4, I25.5, I25.6, I25.8, I25.9, Z95.1 |
|                             | Cerebrovascular diseases (CVD) | I67.0, I67.1, I67.2, I67.3, I67.4, I67.5, I67.6, I67.7, G46, G46.0, G46.1, G46.2, G46.3, G46.4, G46.5, G46.6, G46.7, G46.8                                                                                                                                                               |

**Supplementary Table 2. Baseline characteristics of candidates using all TAM patients (including ≤55 years all).**

| <b>Variable</b>                            | <b>AI<br/>N=18,455</b>  | <b>Total TAM<br/>N=9,537</b> |
|--------------------------------------------|-------------------------|------------------------------|
| <b>Median Age (years) [Q1;Q3]</b>          | <b>67.0 [59.0;77.0]</b> | <b>49.0 [43.0;61.0]</b>      |
| <b>Mean BMI (kg/m<sup>2</sup>) ± (SD)</b>  | <b>29.7 (5.36)</b>      | <b>28.3 (5.53)</b>           |
| <b>Missing, n (%)</b>                      | <b>13,555 (73.45)</b>   | <b>7,768 (81.45)</b>         |
| <b>QMEDEA deprivation index, n (%):</b>    |                         |                              |
| Rural population                           | 3,462 (20.3)            | 1,699 (18.9)                 |
| Urban area #1                              | 3,498 (20.5)            | 1,748 (19.5)                 |
| Urban area #2                              | 2,960 (17.4)            | 1,559 (17.4)                 |
| Urban area #3                              | 2,692 (15.8)            | 1,451 (16.2)                 |
| Urban area #4                              | 2,399 (14.1)            | 1,334 (14.9)                 |
| Urban area #5                              | 2,012 (11.8)            | 1,181 (13.2)                 |
| Missing, n (% of total)                    | 1,432 (7.76)            | 565 (5.92)                   |
| <b>Charlson co-morbidity index, n (%):</b> |                         |                              |
| 0                                          | 2,315 (12.5)            | 1,062 (11.1)                 |
| 1                                          | 704 (3.81)              | 171 (1.79)                   |
| 2                                          | 9,840 (53.3)            | 6,797 (71.3)                 |
| 3                                          | 3,553 (19.3)            | 1,073 (11.3)                 |
| ≥4                                         | 2,043 (11.1)            | 434 (4.55)                   |
| <b>Smoking status, n (%):</b>              |                         |                              |
| Never smokers                              | 10,269 (81.4)           | 3,572 (60.7)                 |
| Current smokers                            | 1,343 (10.7)            | 1,527 (25.9)                 |
| Ex-smokers (quit >1 year)                  | 997 (7.9)               | 788 (13.4)                   |
| Missing, n (% of total)                    | 5,846 (31.68)           | 3,650 (38.27)                |
| <b>Alcoholism, n (%):</b>                  |                         |                              |
| None/Low                                   | 2,410 (85.6)            | 825 (78.3)                   |
| Moderate                                   | 390 (13.8)              | 222 (21.1)                   |
| High/Alcoholic                             | 16 (0.06)               | 6 (0.6)                      |
| Missing, n (% of total)                    | 15,639 (84.74)          | 8,484 (88.96)                |
| <b>Antiplatelet drug users</b>             | <b>1,720 (9.32)</b>     | <b>348 (3.65)</b>            |
| <b>Anticoagulant drug users</b>            | <b>544 (2.95)</b>       | <b>75 (0.79)</b>             |
| <b>Statin drug users</b>                   | <b>3,518 (19.1)</b>     | <b>672 (7.05)</b>            |
| <b>Previous TEE history</b>                | <b>496 (2.69)</b>       | <b>84 (0.88)</b>             |
| <b>Previous CVE history</b>                | <b>693 (3.76)</b>       | <b>133 (1.39)</b>            |

All patients' analysis, non-accounting for postmenopausal status. Abbreviations: AI, aromatase inhibitors; TAM, tamoxifen; BMI, body mass index; Q, quartile; QMEDEA, quintile MEDEA deprivation index; TEE, thromboembolic event; CVE, cerebrovascular event.

**Supplementary Table 3. Thromboembolic, cardiovascular and mortality risk of AI treatment compared with TAM treatment (including all TAM users).**

**a. Hazard risk estimates**

| <b>Outcome</b> | <b>Number of events</b> | <b>Unadjusted HR (95%CI)</b> | <b>Adjusted HR (95%CI)</b> |
|----------------|-------------------------|------------------------------|----------------------------|
| TEEs           | TAM 107                 | 1.44 (1.16 to 1.79)          | 0.89 (0.71 to 1.14)        |
|                | AI 345                  |                              |                            |
| CVEs           | TAM 38                  | 3.08 (2.19 to 4.33)          | 1.51 (1.06 to 2.15)        |
|                | AI 271                  |                              |                            |
| Mortality      | TAM 939                 | 1.66 (1.54 to 1.78)          | 0.80 (0.74 to 0.87)        |
|                | AI 3,644                |                              |                            |

**b. Competing risk estimates**

| <b>Outcome</b> | <b>Number of events</b> | <b>Unadjusted SHR (95%CI)</b> | <b>Adjusted SHR (95%CI)</b> |
|----------------|-------------------------|-------------------------------|-----------------------------|
| TEEs           | TAM 107                 | 1.40 (1.13 to 1.75)           | 0.99 (0.78 to 1.26)         |
|                | AI 345                  |                               |                             |
| CVEs           | TAM 38                  | 3.00 (2.14 to 4.22)           | 1.96 (1.37 to 2.81)         |
|                | AI 271                  |                               |                             |

In all patients' analysis, non-accounting for postmenopausal status, AI participants were 18,455 and TAM participants 9,537. Adjusted results were obtained using continuous Propensity

Score estimates. Abbreviations: HR, hazard ratio; SHR, subdistribution hazard ratio; CI, confidence interval; TEEs, thromboembolic events; CVEs, cardiovascular events.

**Supplementary Table 4. Risk of PE, DVT, CAD and CVD of AI treatment compared with TAM treatment (including all TAM users).**

**a. Hazard ratio estimates**

| Outcome | Subtype | Number of events | Unadjusted HR (95% CI) | Adjusted HR (95% CI) |
|---------|---------|------------------|------------------------|----------------------|
| TEEs    | PE      | TAM 13           | 3.24 (1.81 to 5.79)    | 1.80 (0.98 to 3.30)  |
|         |         | AI 93            |                        |                      |
|         | DVT     | TAM 94           | 1.44 (1.16 to 1.79)    | 0.79 (0.61 to 1.04)  |
|         |         | AI 252           |                        |                      |
| CVEs    | CAD     | TAM 37           | 3.08 (2.19 to 4.34)    | 1.49 (1.04 to 2.13)  |
|         |         | AI 260           |                        |                      |
|         | CVD     | TAM 1            | 3.08 (2.18 to 4.36)    | 2.44 (0.30 to 20.07) |
|         |         | AI 11            |                        |                      |

**b. Competing risk estimates**

| Outcome | Subtype | Number of events | Unadjusted SHR (95% CI) | Adjusted SHR (95% CI) |
|---------|---------|------------------|-------------------------|-----------------------|
| TEEs    | PE      | TAM 13<br>AI 93  | 3.17 (1.78 to 5.68)     | 2.13 (1.16 to 3.91)   |

|     |     |     |                      |                      |
|-----|-----|-----|----------------------|----------------------|
| DVT | TAM | 94  | 1.16 (0.92 to 1.48)  | 0.88 (0.68 to 1.15)  |
|     | AI  | 252 |                      |                      |
| CAD | TAM | 37  | 2.96 (2.10 to 4.18)  | 1.93 (1.33 to 2.78)  |
|     | AI  | 260 |                      |                      |
| CVD | TAM | 1   | 4.63 (0.60 to 35.97) | 2.93 (0.35 to 24.24) |
|     | AI  | 11  |                      |                      |

In all patients' analysis, non-accounting for postmenopausal status, AI participants were 18,455 and TAM participants 9,537. Adjusted results were obtained using continuous Propensity Score estimates. Abbreviations: HR, hazard ratio; SHR, subdistribution hazard ratio; CI, confidence interval; TEEs, thromboembolic events; PE, pulmonary embolism; DVT, deep vein thrombosis, phlebitis and thrombophlebitis; CVEs, cardiovascular events; CAD, coronary artery disease; CVD, cerebrovascular diseases, including stroke and intracerebral hemorrhage.

**Supplementary Table 5. Risk of thromboembolic and cardiovascular events of AI treatment compared with TAM treatment (including all TAM users) using stabilized Inverse Probability Weighting adjustment.**

| Outcome<br>and subtypes | Number<br>of events | Stabilized IPW<br>HR (95% CI) |
|-------------------------|---------------------|-------------------------------|
| TEEs                    | TAM                 | 107                           |
|                         | AI                  | 345                           |
| PE                      | TAM                 | 13                            |
|                         | AI                  | 93                            |

|           |     |       |                     |
|-----------|-----|-------|---------------------|
| DVT       | TAM | 94    | 0.79 (0.57 to 1.10) |
|           | AI  | 252   |                     |
| CVEs      | TAM | 38    | 0.87 (0.56 to 1.38) |
|           | AI  | 271   |                     |
| CAD       | TAM | 37    | 0.85 (0.53 to 1.39) |
|           | AI  | 260   |                     |
| CVD       | TAM | 1     | 0.91 (0.11 to 7.62) |
|           | AI  | 11    |                     |
| Mortality | TAM | 939   | 0.48 (0.44 to 0.53) |
|           | AI  | 3,644 |                     |

In all patients' analysis, non-accounting for postmenopausal status, AI participants were 18,455 and TAM participants 9,537. Abbreviations: IPW HR, Inverse probability weighting hazard ratio; CI, confidence interval; TEEs, thromboembolic events; PE, pulmonary embolism; DVT, deep vein thrombosis, phlebitis and thrombophlebitis; CVEs, cardiovascular events; CAD, coronary artery disease; CVD, cerebrovascular diseases, including stroke and intracerebral hemorrhage.
